# Supplementary material
Source: PubMed Central journal article supplement (PMC5029792)

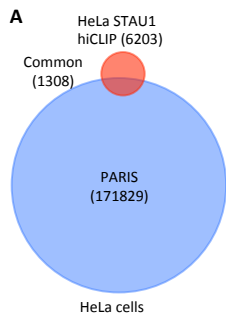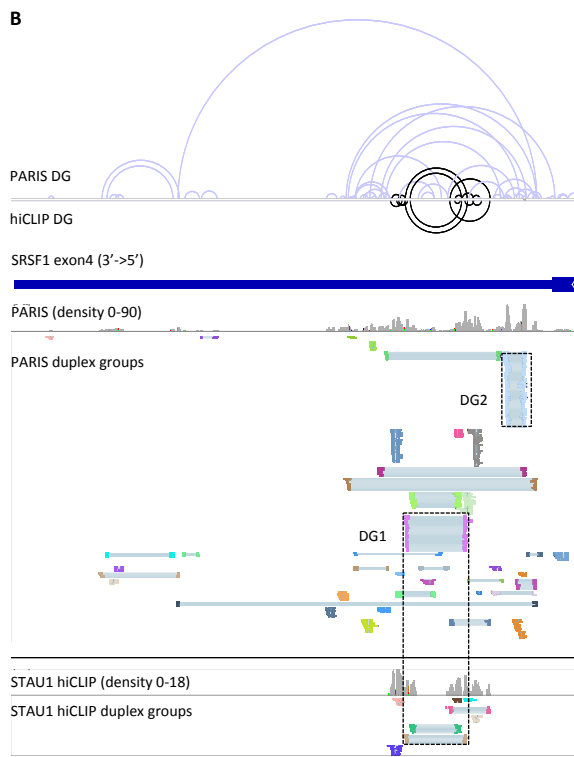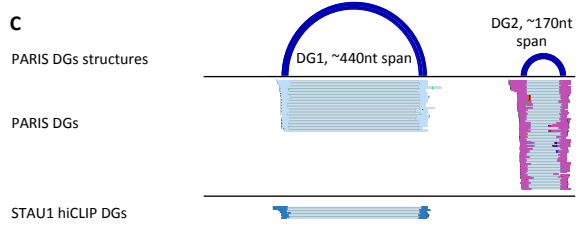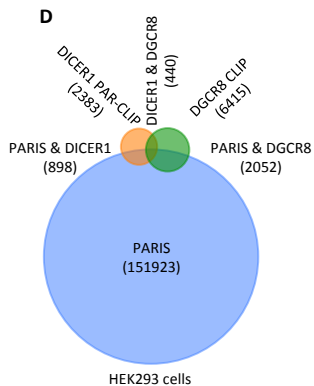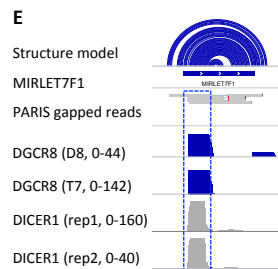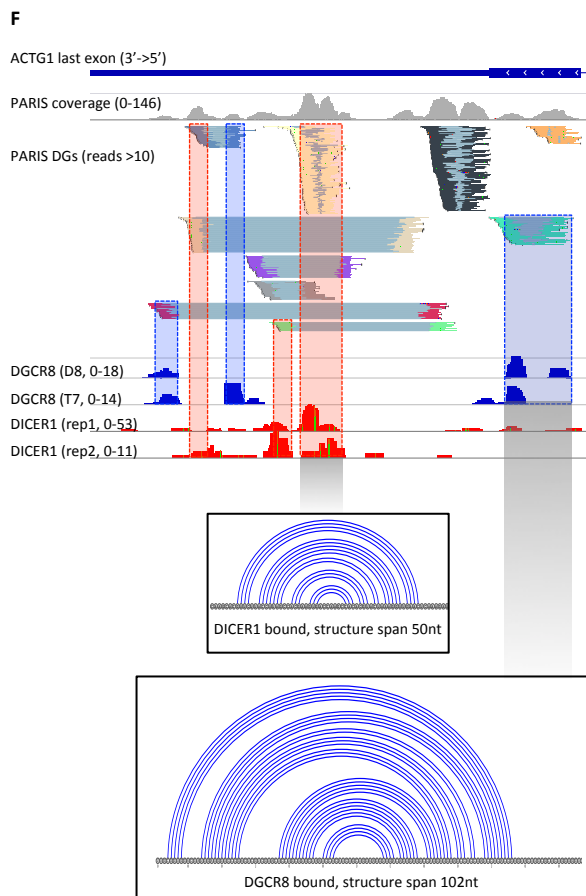

Supplement: NIHMS786793-supplement-10.pdf [file NIHMS786793-supplement-10.pdf]

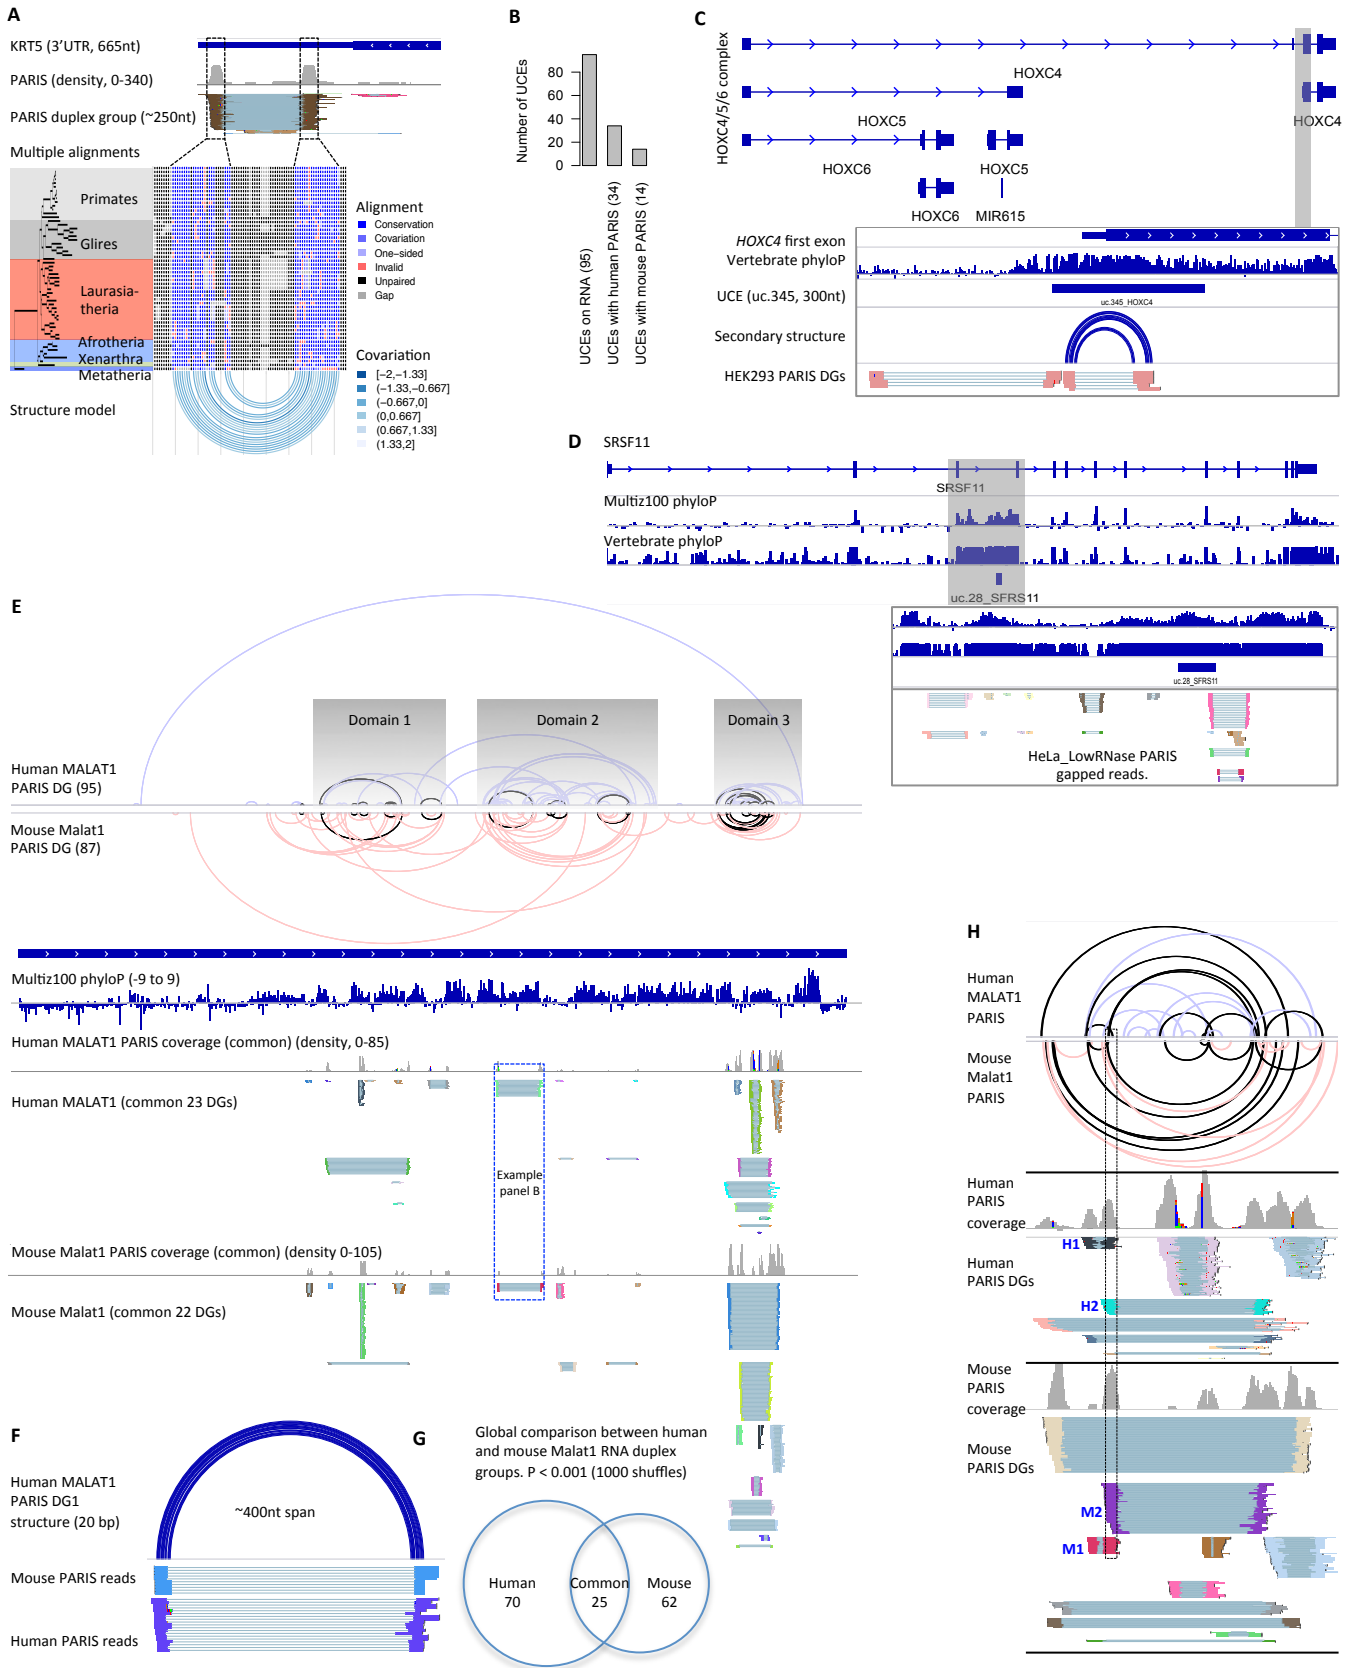

Supplement: NIHMS786793-supplement-11.pdf [file NIHMS786793-supplement-11.pdf]

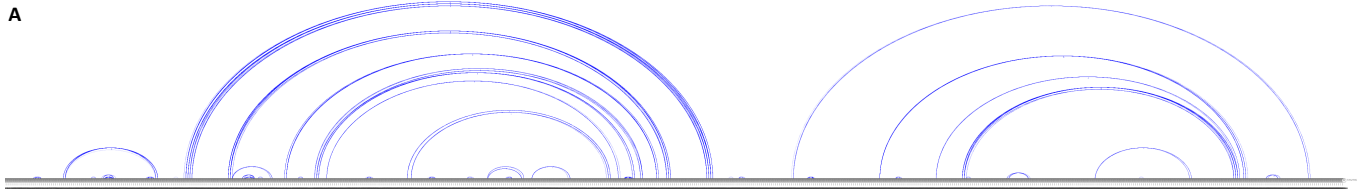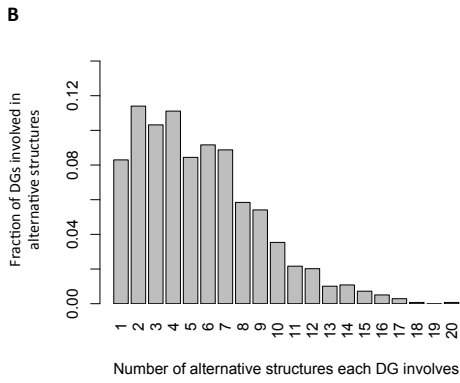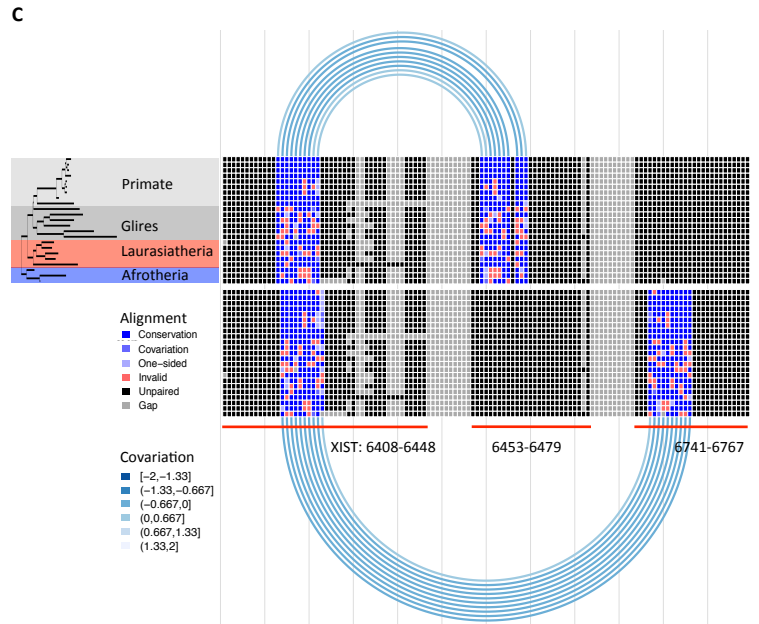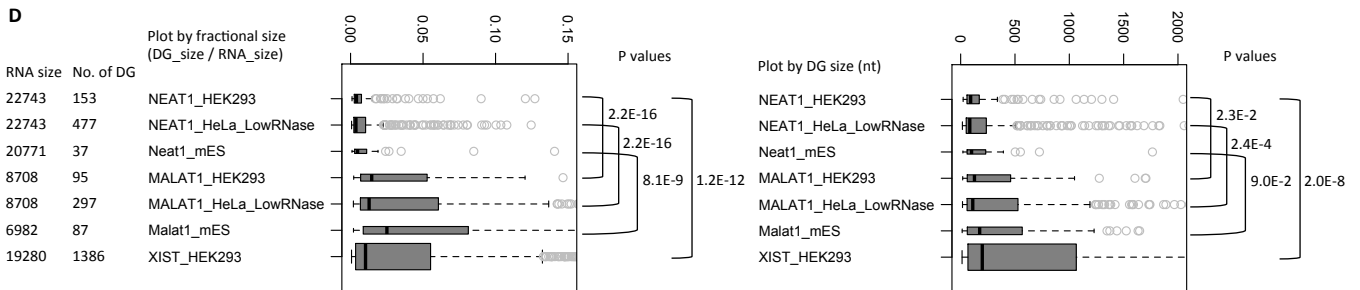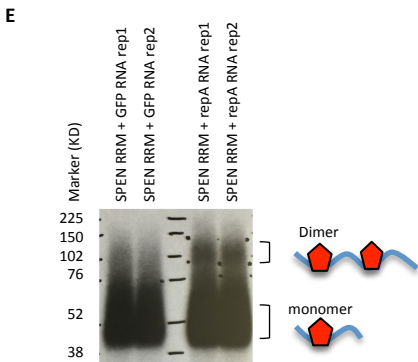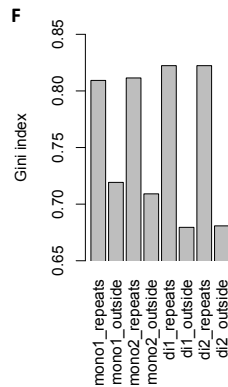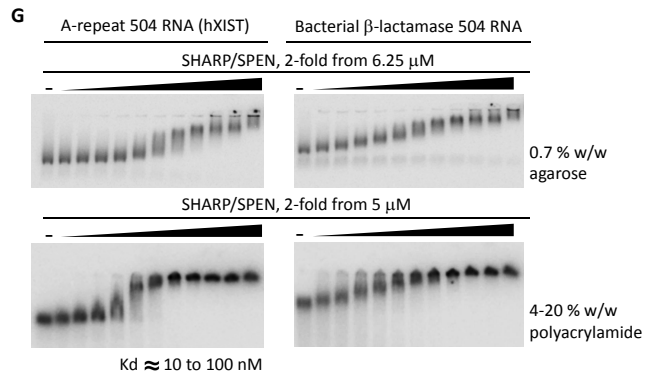

Supplement: NIHMS786793-supplement-13.pdf [file NIHMS786793-supplement-13.pdf]

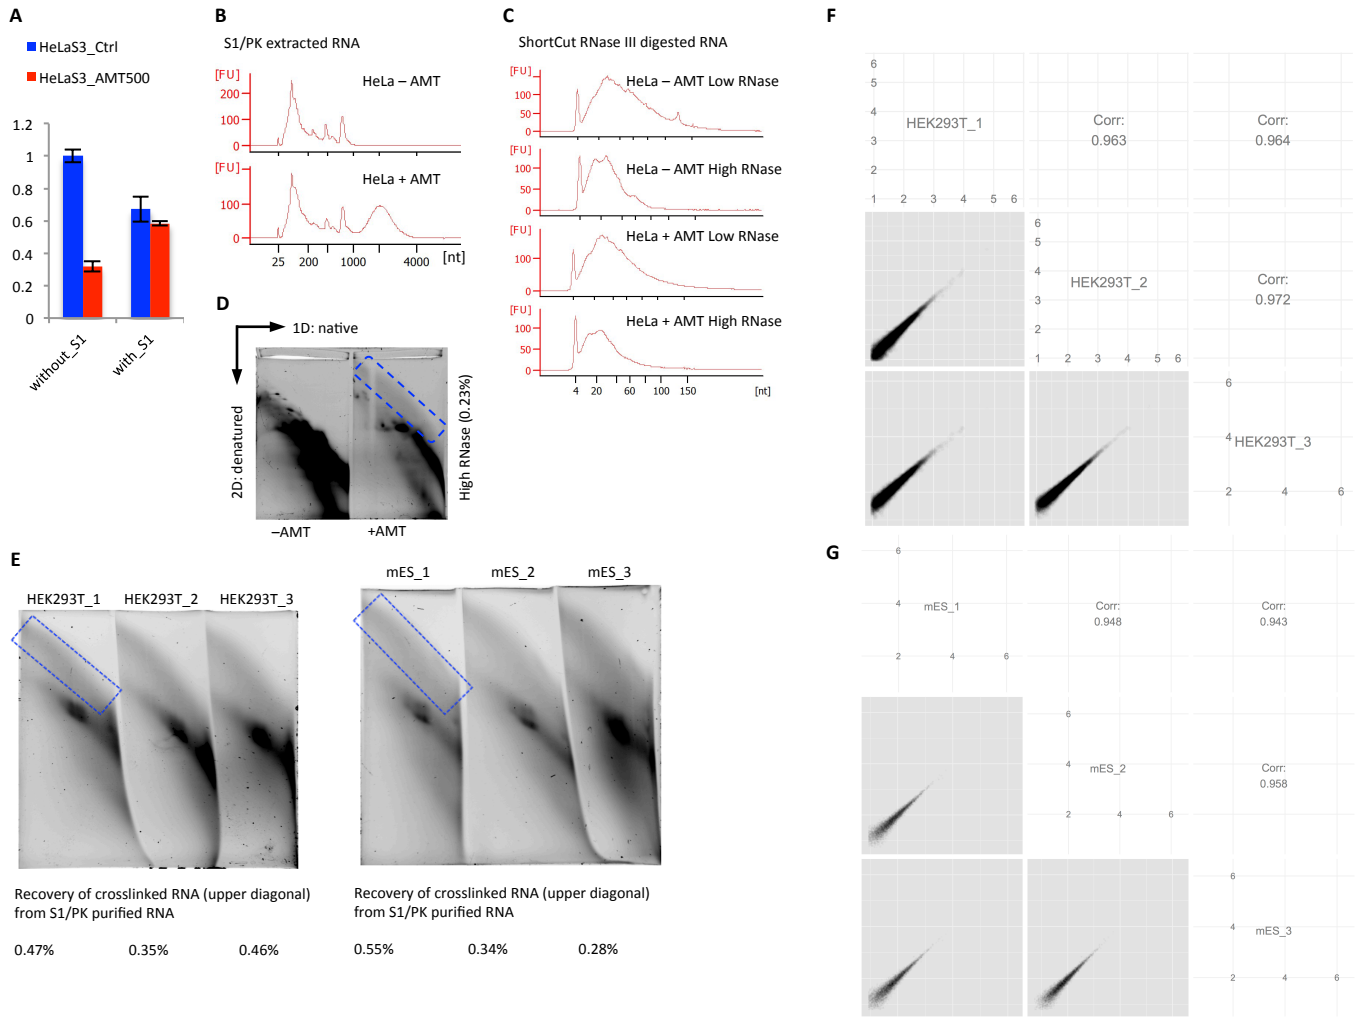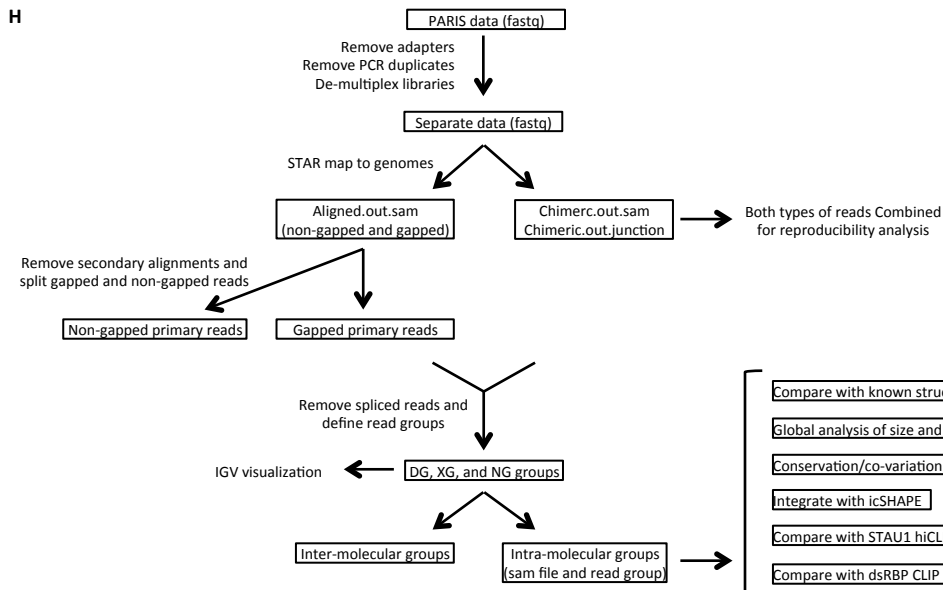

**I**

|   | A      | T      | G      | C      |
|---|--------|--------|--------|--------|
| A | 288882 | 286463 | 423467 | 308373 |
| T | 214886 | 239462 | 501619 | 382091 |
| G | 409765 | 356329 | 613327 | 526031 |
| C | 405210 | 440884 | 372376 | 595196 |

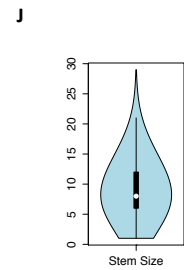

Supplement: NIHMS786793-supplement-7.pdf [file NIHMS786793-supplement-7.pdf]

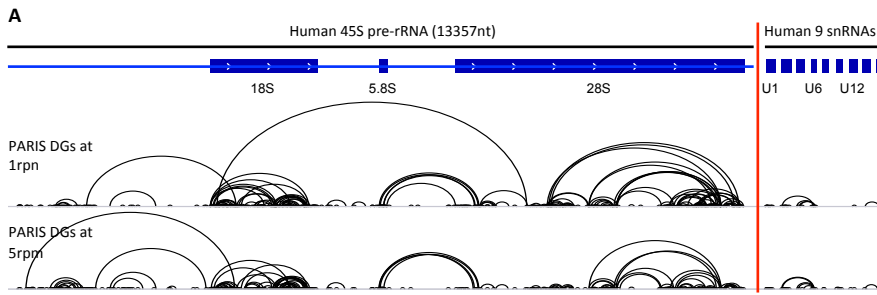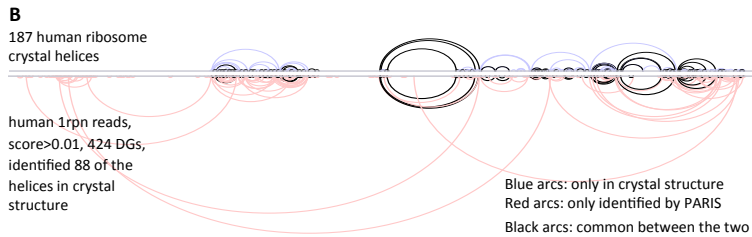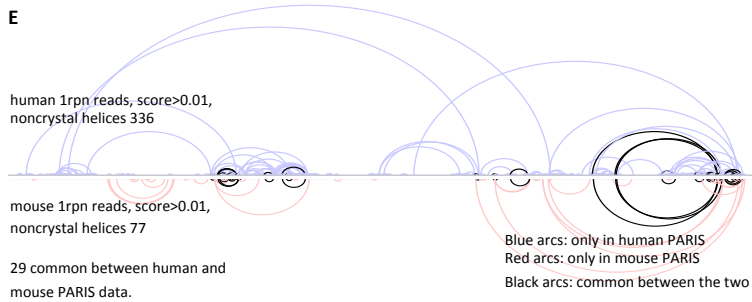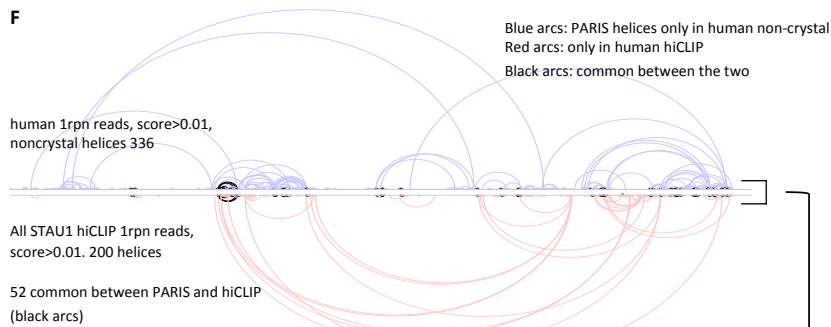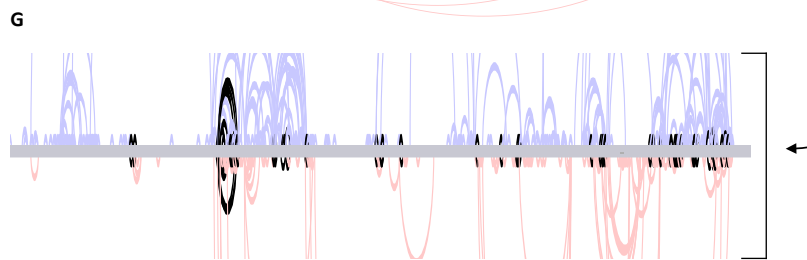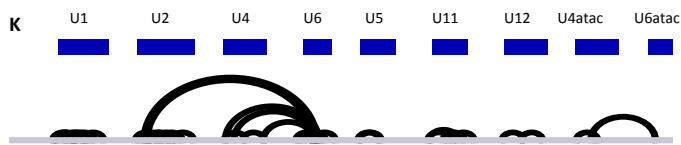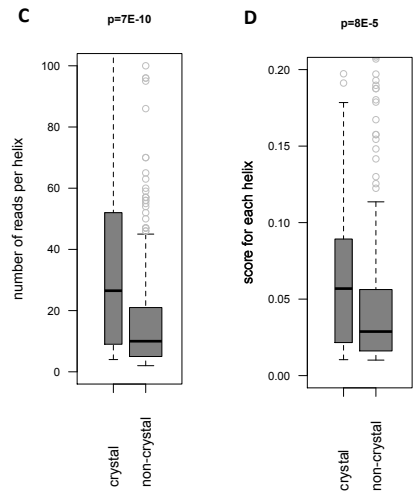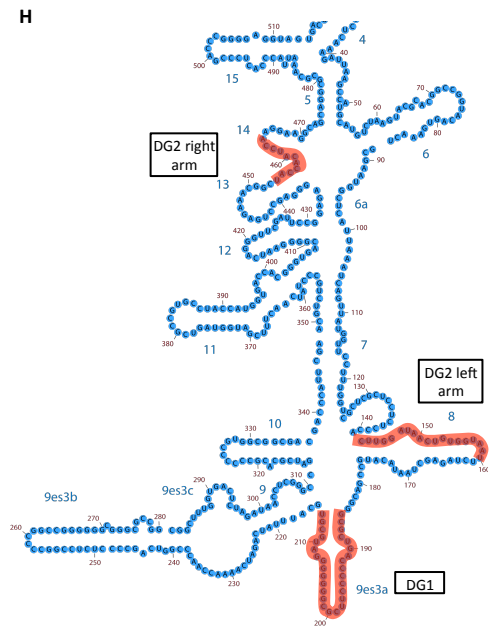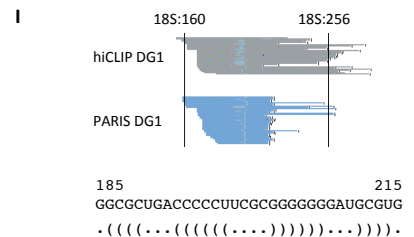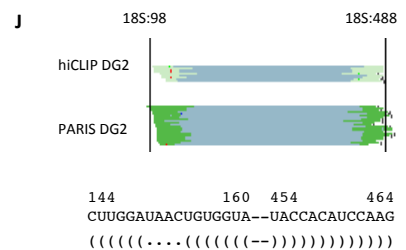

Supplement: NIHMS786793-supplement-8.pdf [file NIHMS786793-supplement-8.pdf]

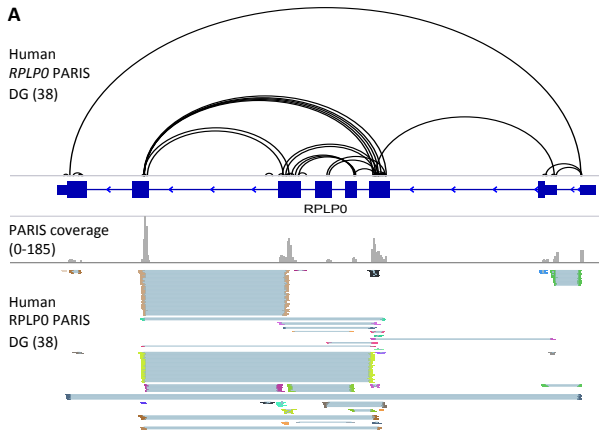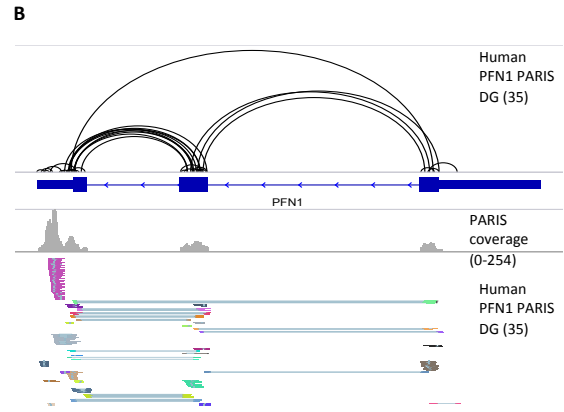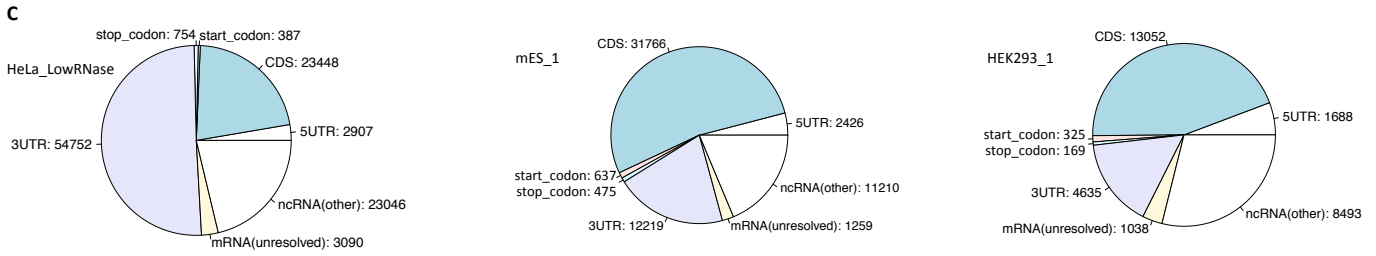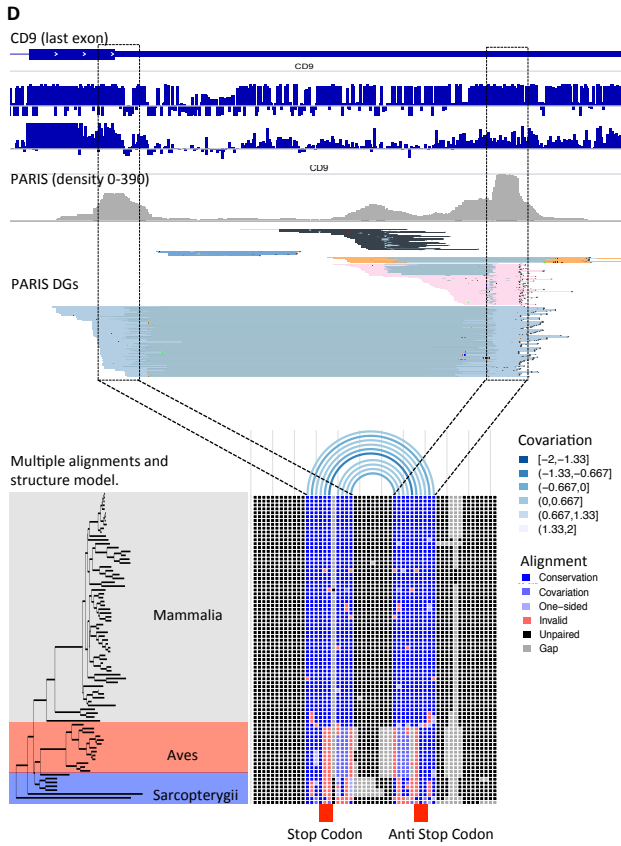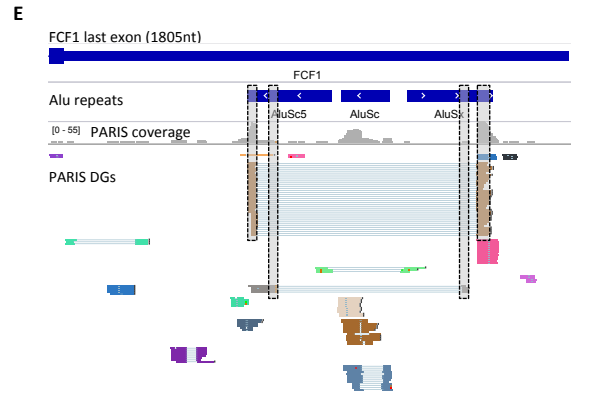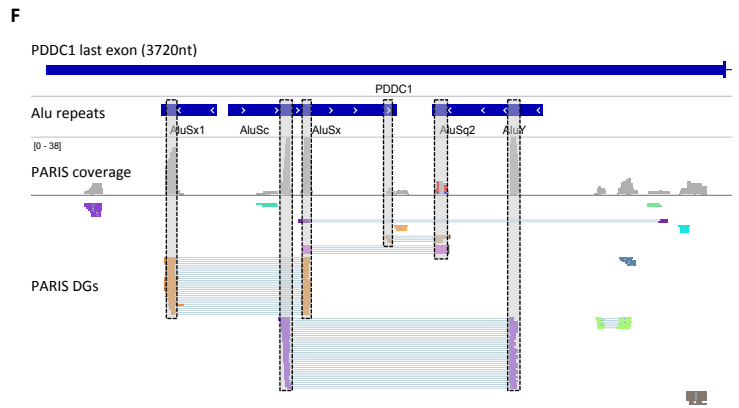

Supplement: NIHMS786793-supplement-9.pdf [file NIHMS786793-supplement-9.pdf]
